# Supplementary material for: E-Cigarettes are More Addictive than Traditional Cigarettes—A Study in Highly Educated Young People
Source: PubMed Central journal article supplement (PMC6651627; doi:10.3390/ijerph16132279), 2019-06-27
Supplement: ijerph-16-02279-s001.pdf [file ijerph-16-02279-s001.pdf]

**Appendix S1** Study questionnaire.

1. Are there any addictions in your family:

Yes

No

If "YES", please specify which addictions were in your family:

Chemical addictions:

a)  alcohol

Please indicate the relationship of the addicted person:

- |                                        |                                      |                                      |
|----------------------------------------|--------------------------------------|--------------------------------------|
| <input type="checkbox"/> Parents:      | <input type="checkbox"/> mother      | <input type="checkbox"/> father      |
| <input type="checkbox"/> Siblings:     | <input type="checkbox"/> sister      | <input type="checkbox"/> brother     |
| <input type="checkbox"/> Grandparents: | <input type="checkbox"/> grandmother | <input type="checkbox"/> grandfather |
| <input type="checkbox"/> aunt/uncle:   | <input type="checkbox"/> uncle       | <input type="checkbox"/> aunt        |
- (I-st line parent's brothers or sisters)

b)  drugs (specify?).....

Please indicate the relationship of the addicted person:

- |                                        |                                      |                                      |
|----------------------------------------|--------------------------------------|--------------------------------------|
| <input type="checkbox"/> Parents:      | <input type="checkbox"/> mother      | <input type="checkbox"/> father      |
| <input type="checkbox"/> Siblings:     | <input type="checkbox"/> sister      | <input type="checkbox"/> brother     |
| <input type="checkbox"/> Grandparents: | <input type="checkbox"/> grandmother | <input type="checkbox"/> grandfather |
| <input type="checkbox"/> aunt/uncle:   | <input type="checkbox"/> uncle       | <input type="checkbox"/> aunt        |
- (I-st line parent's brothers or sisters)

c)  nicotine (cigarettes, e-cigarettes, pipe, cigars, nicotine chewing)

Please indicate the relationship of the addicted person:

- |                                        |                                      |                                      |
|----------------------------------------|--------------------------------------|--------------------------------------|
| <input type="checkbox"/> Parents:      | <input type="checkbox"/> mother      | <input type="checkbox"/> father      |
| <input type="checkbox"/> Siblings:     | <input type="checkbox"/> sister      | <input type="checkbox"/> brother     |
| <input type="checkbox"/> Grandparents: | <input type="checkbox"/> grandmother | <input type="checkbox"/> grandfather |
| <input type="checkbox"/> aunt/uncle:   | <input type="checkbox"/> uncle       | <input type="checkbox"/> aunt        |
- (I-st line parent's brothers or sisters)

Behavioral addiction:

a)  gambling

Please indicate the relationship of the addicted person:

- |                                        |                                      |                                      |
|----------------------------------------|--------------------------------------|--------------------------------------|
| <input type="checkbox"/> Parents:      | <input type="checkbox"/> mother      | <input type="checkbox"/> father      |
| <input type="checkbox"/> Siblings:     | <input type="checkbox"/> sister      | <input type="checkbox"/> brother     |
| <input type="checkbox"/> Grandparents: | <input type="checkbox"/> grandmother | <input type="checkbox"/> grandfather |
| <input type="checkbox"/> aunt/uncle:   | <input type="checkbox"/> uncle       | <input type="checkbox"/> aunt        |
- (I-st line parent's brothers or sisters)

b)  Computer games

Please indicate the relationship of the addicted person:

- |                                        |                                      |                                      |
|----------------------------------------|--------------------------------------|--------------------------------------|
| <input type="checkbox"/> Parents:      | <input type="checkbox"/> mother      | <input type="checkbox"/> father      |
| <input type="checkbox"/> Siblings:     | <input type="checkbox"/> sister      | <input type="checkbox"/> brother     |
| <input type="checkbox"/> Grandparents: | <input type="checkbox"/> grandmother | <input type="checkbox"/> grandfather |
| <input type="checkbox"/> aunt/uncle:   | <input type="checkbox"/> uncle       | <input type="checkbox"/> aunt        |
- (I-st line parent's brothers or sisters)

2. Do you think you are addicted to any of the following:

Alcohol

Drugs (specify?).....

Nicotine (Please choose the form of nicotine delivery):

cigarette

e-cigarette

cigar

pipe

shisha

chewing nicotine

Gambling

Computer Games

3. Whether someone smoked a cigarette or an e-cigarette in your family home?

a) cigarette

Yes

No

"Yes", please indicate which household smoked .....

b) e-cigarette

Yes

No

"Yes", please indicate which household smoked .....

4. Whether in the current place of your residence someone smoked/smokes?

a) cigarette

Yes

No

"Yes", please indicate which household smoke .....

b) e-cigarette

Yes

No

"Yes", please indicate which household smoke .....

5. Is someone currently smoking a cigarette or e-cigarette in your closest surrounding?

|                                 | Cigarette                | E-cigarette              |
|---------------------------------|--------------------------|--------------------------|
| a) parents                      | <input type="checkbox"/> | <input type="checkbox"/> |
| b) siblings                     | <input type="checkbox"/> | <input type="checkbox"/> |
| c) grandparents                 | <input type="checkbox"/> | <input type="checkbox"/> |
| d) partner                      | <input type="checkbox"/> | <input type="checkbox"/> |
| e) roommate                     | <input type="checkbox"/> | <input type="checkbox"/> |
| f) one of three closest friends | <input type="checkbox"/> | <input type="checkbox"/> |

**Questions about cigarette smoking**

6. How long do you smoke ?

..... months

7. How often do you smoke ?

Everyday

2-3 times a week

Once a week

Less than once a week

8. How many cigarettes per day do you smoke

..... cigarettes per day

9. What are the average intervals between cigarettes? (Please circle the correct one)

Minutes

|   |   |   |   |   |   |   |   |   |    |
|---|---|---|---|---|---|---|---|---|----|
| 1 | 2 | 3 | 4 | 5 | 6 | 7 | 8 | 9 | 10 |
|---|---|---|---|---|---|---|---|---|----|

|    |    |    |    |    |
|----|----|----|----|----|
| 20 | 30 | 40 | 50 | 60 |
|----|----|----|----|----|

Hours

|   |   |   |   |   |   |   |   |   |    |
|---|---|---|---|---|---|---|---|---|----|
| 1 | 2 | 3 | 4 | 5 | 6 | 7 | 8 | 9 | 10 |
|---|---|---|---|---|---|---|---|---|----|

10. . When did you stop smoking, did any of these symptoms occur?

Duration of symptom [months]

headache

|   |   |   |   |   |   |   |   |   |    |
|---|---|---|---|---|---|---|---|---|----|
| 1 | 2 | 3 | 4 | 5 | 6 | 7 | 8 | 9 | 10 |
|---|---|---|---|---|---|---|---|---|----|

irritability

|   |   |   |   |   |   |   |   |   |    |
|---|---|---|---|---|---|---|---|---|----|
| 1 | 2 | 3 | 4 | 5 | 6 | 7 | 8 | 9 | 10 |
|---|---|---|---|---|---|---|---|---|----|

anxiety in the hands

|   |   |   |   |   |   |   |   |   |    |
|---|---|---|---|---|---|---|---|---|----|
| 1 | 2 | 3 | 4 | 5 | 6 | 7 | 8 | 9 | 10 |
|---|---|---|---|---|---|---|---|---|----|

difficulty in concentratio

|   |   |   |   |   |   |   |   |   |    |
|---|---|---|---|---|---|---|---|---|----|
| 1 | 2 | 3 | 4 | 5 | 6 | 7 | 8 | 9 | 10 |
|---|---|---|---|---|---|---|---|---|----|

increased appetite

|   |   |   |   |   |   |   |   |   |    |
|---|---|---|---|---|---|---|---|---|----|
| 1 | 2 | 3 | 4 | 5 | 6 | 7 | 8 | 9 | 10 |
|---|---|---|---|---|---|---|---|---|----|

insomnia

|   |   |   |   |   |   |   |   |   |    |
|---|---|---|---|---|---|---|---|---|----|
| 1 | 2 | 3 | 4 | 5 | 6 | 7 | 8 | 9 | 10 |
|---|---|---|---|---|---|---|---|---|----|

anxiety

|   |   |   |   |   |   |   |   |   |    |
|---|---|---|---|---|---|---|---|---|----|
| 1 | 2 | 3 | 4 | 5 | 6 | 7 | 8 | 9 | 10 |
|---|---|---|---|---|---|---|---|---|----|

frequent cough

|   |   |   |   |   |   |   |   |   |    |
|---|---|---|---|---|---|---|---|---|----|
| 1 | 2 | 3 | 4 | 5 | 6 | 7 | 8 | 9 | 10 |
|---|---|---|---|---|---|---|---|---|----|

**Questions about e-cigarette use**

11. How long do you use e-cigarette?

..... months

12. How often do you use e-cigarette?

Everyday

2-3 times a week

Once a week

Less than once a week

13. How many times a day do you use an e-cigarette (number of e-smoking session: one e-smoking session consist of 15 puffs or approximately 10 minutes of use) ?

..... number of e-smoking sessions

14. What are the average intervals between e-smoking sessions? (Please circle the correct one)

Minutes

|   |   |   |   |   |   |   |   |   |    |
|---|---|---|---|---|---|---|---|---|----|
| 1 | 2 | 3 | 4 | 5 | 6 | 7 | 8 | 9 | 10 |
|---|---|---|---|---|---|---|---|---|----|

|    |    |    |    |    |
|----|----|----|----|----|
| 20 | 30 | 40 | 50 | 60 |
|----|----|----|----|----|

Hours

|   |   |   |   |   |   |   |   |   |    |
|---|---|---|---|---|---|---|---|---|----|
| 1 | 2 | 3 | 4 | 5 | 6 | 7 | 8 | 9 | 10 |
|---|---|---|---|---|---|---|---|---|----|

15. When did you stop e-smoking, did any of these symptoms occur?

Duration of symptom [months]

headache

|   |   |   |   |   |   |   |   |   |    |
|---|---|---|---|---|---|---|---|---|----|
| 1 | 2 | 3 | 4 | 5 | 6 | 7 | 8 | 9 | 10 |
|---|---|---|---|---|---|---|---|---|----|

irritability

|   |   |   |   |   |   |   |   |   |    |
|---|---|---|---|---|---|---|---|---|----|
| 1 | 2 | 3 | 4 | 5 | 6 | 7 | 8 | 9 | 10 |
|---|---|---|---|---|---|---|---|---|----|

anxiety in the hands

|   |   |   |   |   |   |   |   |   |    |
|---|---|---|---|---|---|---|---|---|----|
| 1 | 2 | 3 | 4 | 5 | 6 | 7 | 8 | 9 | 10 |
|---|---|---|---|---|---|---|---|---|----|

difficulty in concentratio

|   |   |   |   |   |   |   |   |   |    |
|---|---|---|---|---|---|---|---|---|----|
| 1 | 2 | 3 | 4 | 5 | 6 | 7 | 8 | 9 | 10 |
|---|---|---|---|---|---|---|---|---|----|

increased appetite

|   |   |   |   |   |   |   |   |   |    |
|---|---|---|---|---|---|---|---|---|----|
| 1 | 2 | 3 | 4 | 5 | 6 | 7 | 8 | 9 | 10 |
|---|---|---|---|---|---|---|---|---|----|

insomnia

|   |   |   |   |   |   |   |   |   |    |
|---|---|---|---|---|---|---|---|---|----|
| 1 | 2 | 3 | 4 | 5 | 6 | 7 | 8 | 9 | 10 |
|---|---|---|---|---|---|---|---|---|----|

anxiety

|   |   |   |   |   |   |   |   |   |    |
|---|---|---|---|---|---|---|---|---|----|
| 1 | 2 | 3 | 4 | 5 | 6 | 7 | 8 | 9 | 10 |
|---|---|---|---|---|---|---|---|---|----|

frequent cough

|   |   |   |   |   |   |   |   |   |    |
|---|---|---|---|---|---|---|---|---|----|
| 1 | 2 | 3 | 4 | 5 | 6 | 7 | 8 | 9 | 10 |
|---|---|---|---|---|---|---|---|---|----|

16. Which type of cigarette provides greater satisfaction in selected aspects that accompany smoking?

|                       | cigarette | no difference | e-cigarette |
|-----------------------|-----------|---------------|-------------|
| Feeling of relax      | [ ]       | [ ]           | [ ]         |
| Breathing in          | [ ]       | [ ]           | [ ]         |
| Breathing out         | [ ]       | [ ]           | [ ]         |
| Smoking satisfaction  | [ ]       | [ ]           | [ ]         |
| Taste                 | [ ]       | [ ]           | [ ]         |
| Smell                 | [ ]       | [ ]           | [ ]         |
| With a cup of coffee  | [ ]       | [ ]           | [ ]         |
| After meal            | [ ]       | [ ]           | [ ]         |
| After sex             | [ ]       | [ ]           | [ ]         |
| In a group of friends | [ ]       | [ ]           | [ ]         |

17. Have you noticed any changes in the last symptoms since you have used the e-cigarette?

|                                | improvement | no difference | deterioration |
|--------------------------------|-------------|---------------|---------------|
| Tolerance of effort            | [ ]         | [ ]           | [ ]           |
| Cough                          | [ ]         | [ ]           | [ ]           |
| Tightness of the chest         | [ ]         | [ ]           | [ ]           |
| Wheezing, squeaks in the chest | [ ]         | [ ]           | [ ]           |
| Beathlessness                  | [ ]         | [ ]           | [ ]           |
| Dizziness                      | [ ]         | [ ]           | [ ]           |
| Weakness                       | [ ]         | [ ]           | [ ]           |
| Headache                       | [ ]         | [ ]           | [ ]           |
| Scratching in the throat       | [ ]         | [ ]           | [ ]           |
| Smell                          | [ ]         | [ ]           | [ ]           |
| Taste                          | [ ]         | [ ]           | [ ]           |
| Dry mucous membranes           | [ ]         | [ ]           | [ ]           |
